# Supplementary material for: Gut bacterial and fungal communities of the domesticated silkworm (Bombyx mori) and wild mulberry-feeding relatives
Source: PubMed Central journal article supplement (PMC6092317; doi:10.1038/s41396-018-0174-1), 2018-06-12
Supplement: 41396_2018_174_MOESM1_ESM.pdf [file 41396_2018_174_MOESM1_ESM.pdf]

# 1 **Supplementary Materials**

2 **Title: Gut bacterial and fungal communities of the domesticated silkworm**  
3 **(*Bombyx mori*) and wild mulberry-feeding relatives**

4

5 Bosheng Chen<sup>1</sup>, Kaiqian Du<sup>1</sup>, Chao Sun<sup>2</sup>, Arunprasanna Vimalanathan<sup>1</sup>, Xili  
6 Liang<sup>1</sup>, Yong Li<sup>3</sup>, Baohong Wang<sup>4</sup>, Xingmeng Lu<sup>1</sup>, Lanjuan Li<sup>4</sup> and Yongqi  
7 Shao<sup>1,5,\*</sup>

8

9 <sup>1</sup>Institute of Sericulture and Apiculture, College of Animal Sciences, Zhejiang  
10 University, Hangzhou, China; <sup>2</sup>Analysis Center of Agrobiolgy and  
11 Environmental Sciences, Zhejiang University, Hangzhou, China; <sup>3</sup>Institute of  
12 Soil and Water Resources and Environmental Science, College of  
13 Environmental and Resource Sciences, Zhejiang University, Hangzhou, China;  
14 <sup>4</sup>National Collaborative Innovation Center for Diagnosis and Treatment of  
15 Infectious Diseases, State Key Laboratory for Diagnosis and Treatment of  
16 Infectious Diseases, the First Affiliated Hospital, School of Medicine, Zhejiang  
17 University, Hangzhou, China and <sup>5</sup>Key Laboratory for Molecular Animal  
18 Nutrition, Ministry of Education, China

19

20 \*Correspondence: Yongqi Shao, E-mail: [yshao@zju.edu.cn](mailto:yshao@zju.edu.cn)

21

## 22 **Supplementary Methods**

### 23 **Denaturing gradient gel electrophoresis (DGGE)**

24 DGGE investigation of microbiota profile of individual insect and mulberry leaf  
25 was performed along with the Illumina MiSeq sequencing (Takano *et al.* 2017,  
26 Thompson *et al.* 2008). To amplify the variable V6-V8 region of 16S rRNA gene,  
27 PCR was conducted with the primer set 968F-GC-Clamp and 1401R  
28 (Supplementary Table S1) under the following conditions: an initial cycle at  
29 94 °C for 1 min; 25 cycles at 94 °C for 30 s, 55 °C for 30 s, and 72 °C for 1 min;  
30 and a final cycle of 72 °C for 10 min. The 50- $\mu$ L PCR mixture contained 2 $\times$  Gflex  
31 Buffer (TaKaRa Bio), 0.4 mM dNTP mixture, 0.2  $\mu$ M each primer, 1.25 U of Tks  
32 Gflex DNA Polymerase, and 2.0  $\mu$ L of DNA.

33 DGGE was carried out using the DCode Universal Mutation Detection System  
34 (Bio-Rad) onto the 8% polyacrylamide gel with a 20 to 80% denaturant gradient  
35 (100% denaturant = 7 M urea and 40% (v/v) deionized formamide). Gels were  
36 poured with the aid of a Bio-Rad gradient delivery system. PCR products (~300  
37 ng) were electrophoresed in 1 $\times$  TAE buffer (40 mM Tris, 20 mM acetic acid, and  
38 1 mM EDTA) at 60 °C for 14 h at 100 V. Gels were stained with SYBR Green I  
39 (TaKaRa Bio) for 30 min and then photographed under UV light. DGGE profiles  
40 of bacterial 16S rRNA genes were analyzed using Quantity One software  
41 (version 4.6.2; Bio-Rad) and BioNumerics software (version 6.01; Applied  
42 Maths) as described previously (Chen *et al.* 2016, Lu *et al.* 2013, Thompson *et*

43 *al.* 2008).

44

#### 45 **Illumina sequencing**

46 The V4-V5 region of the eubacteria 16S rRNA gene and the fungal nuclear  
47 ribosomal internal transcribed spacer (ITS) region were amplified with primers  
48 515F-907R and ITS1F-ITS2, respectively (**Supplementary Table S1**). The  
49 sequencing primers contained the adapter and barcode sequences. The PCR  
50 reaction was performed in triplicate for each sample. For each reaction, 20  $\mu$ L  
51 of mixture was prepared, including 5 x FastPfu reaction buffer, 250  $\mu$ M dNTPs,  
52 1 U FastPfu Polymerase (Transgene, Beijing, China), 200 nM of each primer  
53 (Majorbio, Shanghai, China), 1  $\mu$ L of template and DNA-free water. The PCR  
54 reaction involved a single denaturation step at 95 °C for 3 min, followed by 27  
55 cycles of 95 °C for 30 s, 55 °C for 30 s, 72 °C for 45 s, and finished after a  
56 final extension at 72°C for 10 min. The triplicate reaction products were pooled  
57 and run on a 2% (w/v) agarose gel. Gel fragment of correct size was excised  
58 and purified with AxyPrep DNA gel extraction kit (Axygen, Union City, USA).  
59 After quantified by Quantifluor dsDNA system (Promega, Madison, USA),  
60 products were calculated into equal amount and mixed for Illumina MiSeq (San  
61 Diego, CA, USA) paired-end sequencing by a certified sequencing provider  
62 (Majorbio, Shanghai, China).

63

#### 64 **Quality filtering and de-multiplexing**

65 The pair-end raw data were initially merged by FLASH (version 1.2.7) (Magoc  
66 and Salzberg 2011) with a minimum overlap of 10 base pairs. Merged  
67 sequences were trimmed and filtered by Trimmomatic (version 0.36) (Bolger *et*  
68 *al.* 2014). Sequences below quality score 20 were end-trimmed to remove low  
69 quality nucleotides, and subsequently a 50-nucleotide sliding window scanning  
70 from 5' end of read was used to trim group of bases lower than 20 quality score.  
71 Sequences lower than 50 bp, primer mismatch >2, barcode mismatch >0 were  
72 discarded. According to their unique barcode tags, sequences were  
73 demultiplexed for the OTU picking and taxonomic assignment.

74

#### 75 **OTU picking and taxonomic assignment**

76 Sequences passed quality filters were initially taken to identify chimeric  
77 sequences by UCHIME algorithm in usearch (version 7.1) (Edgar 2010) with  
78 the script *identify\_chimeric\_seqs.py* implemented in the QIIME software  
79 (version 1.8.0) (Caporaso *et al.* 2010). The script *filter\_fasta.py* was used for  
80 removing chimeric sequences. Afterwards, sequences were clustered into  
81 OTUs by usearch with the script *pick\_otus.py* with a similarity threshold of 97%.  
82 Using the *pick\_rep\_set.py* script, the most abundant sequence in each OTU  
83 cluster was picked as the representative sequence. Representative sequences  
84 were classified taxonomically by the script *assign\_taxonomy.py* using  
85 Greengenes (method, rdp; confidence, 0.80) and Unite database for bacteria  
86 and fungi respectively (DeSantis *et al.* 2006, Koljalg *et al.* 2013). To avoid the

87 affection of sequencing depth in difference samples, using the script  
88 *single\_rarefaction.py* in QIIME, sequences from difference samples were  
89 rarefied to the same depth including a large portion of the OTUs and diversity  
90 (486 for bacteria DNA data, Good's coverage 94.1%; 612 for bacteria RNA data,  
91 Good's coverage 91.7%; and 177 for fungi DNA data, Good's coverage 86.2%),  
92 as reported for insects (Yun *et al.* 2014). Rarefaction curve and diversity indices  
93 (Sobs, Chao1, ACE, and Shannon) were calculated by 3 steps: First, rarefy  
94 OTU table by "multiple\_rarefactions.py" with iteration=1000, step=60. The  
95 rarefied OTU table generated by random sampling at first step was used for  
96 calculating alpha diversity indices by script "alpha\_diversity.py". Finally, results  
97 of every sample were concatenated into a single file by script "collate\_alpha.py".  
98 Matrices of weighted and unweighted UniFrac were obtained from the script  
99 "beta\_diversity.py" with the phylogenetic tree generate by "make\_phylogeny.py".

100

## 101 **Data visualization**

- 102 1. The bar plots of relative abundance of bacteria and fungi in different host  
103 species and across different life stages of *B. mori* (Figures 1b, 2a, 4b, 5a  
104 and 5b) were visualized by GraphPad Prism (version 6.01) based on the  
105 rarefied OTU table, respectively.
- 106 2. The boxplot of bacteria gene copies (Figures 1a, 3a and 4a) was generated  
107 by R with the function *geom\_boxplot* of the *ggplot2* package (R 2014,  
108 Wickham 2016).

109 3. Analysis of alpha diversity estimates and beta diversity indices  
110 (**Supplementary Table S3**) were based on the rarefied OTU table. Alpha  
111 diversity estimators Ace, Chao, beta diversity indices Shannon, Simpson,  
112 and Good's coverage were computed by the *summary.single* command of  
113 the mothur software (version 1.30.1) (Schloss *et al.* 2009). The boxplots  
114 (Figures 1a, 3b and 4a) showing the species richness and community  
115 diversity were based on the OTU number and the Shannon index,  
116 respectively, and were visualized by the R package *ggplot2* with the function  
117 *geom\_boxplot*.

118 4. Considering the large difference in taxon abundance between samples, the  
119 PCoA analyses (Figures 1c, 3b, 4d, 5c, 5d) were performed based on the  
120 relative abundances of OTUs, and the Bray-Curits distance was calculated  
121 using the R package *vegan* with the function *vegdist* and *procomp* (Kelly *et*  
122 *al.* 2015, Oksanen *et al.* 2007, Tang *et al.* 2016).

123 5. Heat maps (Figures 1d, 2b, 4e, 5e, 5f) were generated by the R package  
124 *vegan* with the function *vegdist* and *hclust*, and the *ggplot2* package with  
125 the function *geom\_tile*. The Bray-Curits method was used to calculate the  
126 distance, followed with Complete-linkage clustering to visualize relationship  
127 between samples.

128 6. The Venn diagram (Figure 4c) was based on the OTU list (**Supplementary**  
129 **Table S5**), and generated by the R package *VennDiagram* with the function  
130 *venn.diagram*.

131

132 **Mothur analysis**

133 Demultiplexed sequences were introduced to Mothur software (Version 1.38.1)  
134 (Schloss *et al.* 2009). Sequences were joined into contigs by command  
135 “make.contigs” with a list file generated by command “make.file”. Any  
136 sequences with ambiguous bases (maxambig=0) and too-long sequences  
137 (maxlength=275) were removed by “screen.seqs” command. Afterwards,  
138 identical sequences were merged by “unique.seqs” command and aligned  
139 against to the Greengenes (Version 13\_8) (McDonald *et al.* 2012) or SILVA  
140 (Release 128) reference database (Pruesse *et al.* 2007) respectively by  
141 “align.seqs” command (we have done both alignments to compare any  
142 differences between the two databases used). After removing gap characters  
143 (“filter.seqs” command) and duplicate sequences (re-run “unique.seqs”  
144 command), the remaining sequences were pre-clustered by command  
145 “pre.cluster” with diffs=2. “chimera.uchime” and “remove.seqs” commands  
146 were used for identification and removing of chimera sequences (Edgar 2010).  
147 The Naïve Bayesian method was used for sequence clustering (Wang *et al.*  
148 2007), with Greengenes taxonomy as reference and a bootstrap value of 80%  
149 (“classify.seqs” command). Unknown sequences, Archaea sequences,  
150 chloroplast sequences, mitochondria sequences were removed by command  
151 “remove.lineage”. Cutoff=0.20 was used in the “dist.seqs” command before all  
152 sequences clustered into OTU at a divergence of 3% (“cluster.spilt”, taxlevel=4).

153 Phylogenetic tree was generated by FastTree (Version 2.1.3) with generalized  
154 time-reversible (GTR) substitution method (Price *et al.* 2010). Each classified  
155 OTU was assigned a taxonomy information with command “classify.otu” and  
156 binned into phylotypes with the “phylotype” command. For diversity analysis, all  
157 samples were normalized by “sub.sample” command to 447 sequences per  
158 DNA sample, and 697 sequences per RNA sample, in order to retain more  
159 samples. Alpha diversity analysis was performed by command  
160 “summary.single”, which generated observed species, Chao1, ace, Shannon  
161 indices of each sample. Rarefaction curves were obtained from the command  
162 “rarefaction.single”. Bray-Curtis distance matrices used in the heatmap and  
163 PCoA analysis were calculated by “dist.shared” command. UniFrac test based  
164 on phylogenetic tree was performed by command “unifrac.weighted” and  
165 “unifrac.unweighted”. To measure the variation within groups and significance  
166 of overall variability between groups, a nonparametric analog of Bartlett’s test  
167 for homogeneity of variance, Homogeneity of molecular variance (HOMOVA)  
168 (Schloss 2008), was performed by the command “homova”. Variation between  
169 different groups in PCoA analysis was calculated by PERMANOVA in R  
170 package “vegan”, using the function “adonis”, permutations=999 (Gilleland and  
171 Viii 2014).

172 The data produced by Mothur was further compared with that produced by  
173 QIIME, based on the OTU table combining the 30 most abundance genera in  
174 output of each software. PCoA analysis was based on Bray-Curtis matrices, p-



175 value was calculated by PERMANOVA with permutations=999.

176 **Supplementary Tables**

177 **Supplementary Table S1** Universal primers for the identification of bacteria and fungi.

| Primer/Probe | 5' modification | Sequence ( 5' - 3' )   | Length ( bp ) | Target                                                | References                     |
|--------------|-----------------|------------------------|---------------|-------------------------------------------------------|--------------------------------|
| 27f          |                 | AGAGTTTGATCCTGGCTCAG   | 1465          | Bacteria 16S rRNA gene                                | (Egert <i>et al.</i> 2005)     |
| 1492r        |                 | GGTTACCTTGTTACGACTT    |               |                                                       |                                |
| ITS1         |                 | TCCGTAGGTGAACCTGCGG    | Around 700    | Fungi ITS (internal transcription spacer) gene        | (Anderson and Cairney 2004)    |
| ITS4         |                 | TCCTCCGCTTATTGATATGC   |               |                                                       |                                |
| 515F         |                 | GTGCCAGCMGCCGCGG       | 392           | Bacteria 16S rRNA gene region for Illumina sequencing | (Xiong <i>et al.</i> 2012)     |
| 907R         |                 | CCGTCAATTCMTTTRAGTTT   |               |                                                       |                                |
| ITS1F        |                 | CTTGGTCATTTAGAGGAAGTAA | 300           | Fungi ITS gene region for Illumina sequencing         | (Mukherjee <i>et al.</i> 2014) |
| ITS2         |                 | GCTGCGTTCTTCATCGATGC   |               |                                                       |                                |
| DB200-Qf     |                 | CGGYCCAGACTCCTACGGG    | 200           | Quantitative RT PCR                                   | (Lee <i>et al.</i> 1996)       |
| DB200-Qr     |                 | TTACCGCGGCTGCTGGCAC    |               |                                                       |                                |
| Wolb-Qf      |                 | GCGAAGGCGTCTATCTGGTT   | 178           | Quantitative RT PCR                                   | (This study)                   |
| Wolb-Qr      |                 | AATCTTGCGACCGTAGTCCC   |               |                                                       |                                |

|               |  |                                                                 |     |            |                           |
|---------------|--|-----------------------------------------------------------------|-----|------------|---------------------------|
| 968F-GC-Clamp |  | CGCCCGGGGCGCGCCCGGG<br>CGGGGCGGGGGCACGGGGG<br>AACGCGAAGAACCTTAC | 433 | Eubacteria | (Shao <i>et al.</i> 2014) |
| 1401Ra        |  | CGGTGTGTACAAGCCCGGGA<br>ACG                                     |     |            |                           |
| 1401Rb        |  | CGGTGTGTACAAGCCCGGGA<br>ACG                                     |     |            |                           |

178

179 **Supplementary Table S2** Sequence statistics.

180

|                                                                             | <b>Fungi (DNA-based)</b> | <b>Bacteria (DNA-based)</b> | <b>Bacteria (RNA-based)</b> |
|-----------------------------------------------------------------------------|--------------------------|-----------------------------|-----------------------------|
| <b>Amplified region</b>                                                     | ITS1F_2043R              | 515F_907R                   | 515F_907R                   |
| <b>Sample number</b>                                                        | 9                        | 30                          | 20                          |
| <b>Total bases (bp)</b>                                                     | 287,133,960              | 749,122,552                 | 438,107,448                 |
| <b>Passed QC (bp)</b>                                                       | 175,515,614              | 561,640,440                 | 345,957,709                 |
| <b>Rate passed QC (%)</b>                                                   | 61.13                    | 74.97                       | 78.97                       |
| <b>Average Length (bp)</b>                                                  | 306.86                   | 396.47                      | 396.4                       |
| <b>Total raw reads</b>                                                      | 571,980                  | 1,448,300                   | 872,724                     |
| <b>Total chloroplast reads</b>                                              | -                        | 1,004,219                   | 420,502                     |
| <b>Average reads</b>                                                        | 63,553                   | 48,277                      | 43,636                      |
| <b>Minimum read count</b>                                                   | 177                      | 31387                       | 29034                       |
| <b>Maximum read count</b>                                                   | 22613                    | 58626                       | 54492                       |
| <b>Average reads (chloroplast &amp; mitochondria sequence removed)</b>      | -                        | 14,803                      | 11,488                      |
| <b>Minimum read count (chloroplast &amp; mitochondria sequence removed)</b> | -                        | 486                         | 612                         |
| <b>Maximum read count (chloroplast &amp; mitochondria sequence removed)</b> | -                        | 50887                       | 49473                       |

181

182 **Supplementary Table S3** Diversity metrics across various samples.

183

| Sample ID            | Reads | 0.97 |                  |                  |          |                     |                           |
|----------------------|-------|------|------------------|------------------|----------|---------------------|---------------------------|
|                      |       | OTU  | Ace              | chao             | coverage | Shannon             | Simpson                   |
| <i>B. mori-1</i>     | 486   | 102  | 167<br>(137,223) | 170<br>(135,243) | 0.8971   | 3.59<br>(3.46,3.73) | 0.0567<br>(0.047,0.0664)  |
| <i>B. mori-2</i>     | 486   | 80   | 218<br>(174,282) | 131<br>(103,193) | 0.9156   | 3.15<br>(3.01,3.29) | 0.091<br>(0.0763,0.1057)  |
| <i>B. mori-3</i>     | 486   | 87   | 108<br>-97,132   | 100<br>-92,120   | 0.9465   | 3.46<br>(3.33,3.6)  | 0.0715<br>(0.0582,0.0848) |
| <i>D.pyloalis-1</i>  | 486   | 49   | 64<br>(55,87)    | 61<br>(53,88)    | 0.965    | 2.19<br>(2.03,2.35) | 0.255<br>(0.22,0.2901)    |
| <i>D. pyloalis-2</i> | 486   | 50   | 65<br>(56,89)    | 61<br>(54,82)    | 0.9609   | 1.75<br>(1.58,1.93) | 0.4392<br>(0.3863,0.4921) |

|                      |     |    |         |         |        |             |                 |
|----------------------|-----|----|---------|---------|--------|-------------|-----------------|
|                      |     |    | 100     | 98      |        | 3.62        | 0.0441          |
| <i>D. pyloalis-3</i> | 486 | 81 | -89,123 | -87,125 | 0.9486 | (3.51,3.73) | (0.0375,0.0507) |
|                      |     |    | 40      | 41      |        | 0.41        | 0.8766          |
| <i>A. major-1</i>    | 486 | 19 | (25,94) | -25,106 | 0.9753 | (0.29,0.53) | (0.8363,0.9168) |
|                      |     |    | 21      | 24      |        | 0.58        | 0.8057          |
| <i>A. major-2</i>    | 486 | 16 | (17,39) | (17,59) | 0.9877 | (0.45,0.7)  | (0.7581,0.8532) |
|                      |     |    | 122     | 134     |        | 2.04        | 0.2078          |
| Leaf                 | 486 | 29 | -81,195 | -68,310 | 0.9691 | (1.92,2.15) | (0.1839,0.2317) |

184

185 **Supplementary Table S4** Details of bacterial OTUs shared among *B. mori*, *A.*

186 *major* and *D. pyloalis*.

187

| OTU ID | Phylum         | Genus                       |
|--------|----------------|-----------------------------|
| 23     | Proteobacteria | <i>Pseudomonas</i>          |
| 43     | Proteobacteria | -                           |
| 50     | Firmicutes     | <i>Staphylococcus</i>       |
| 177    | Proteobacteria | <i>Pseudomonas</i>          |
| 435    | Firmicutes     | <i>Sporolactobacillus</i>   |
| 455    | Actinobacteria | <i>Rothia</i>               |
| 486    | Firmicutes     | <i>Enterococcus</i>         |
| 520    | Proteobacteria | <i>Acinetobacter</i>        |
| 681    | Actinobacteria | <i>Corynebacterium</i>      |
| 714    | Proteobacteria | <i>Escherichia-Shigella</i> |
| 957    | Firmicutes     | <i>Allobaculum</i>          |
| 1068   | Proteobacteria | <i>Pantoea</i>              |

188

189 **Supplementary Table S5** Details of bacterial OTUs shared across the larval

190 stages of *B. mori*.

191

| OTU ID | Phylum         | Genus                       |
|--------|----------------|-----------------------------|
| 23     | Proteobacteria | <i>Pseudomonas</i>          |
| 43     | Proteobacteria | -                           |
| 50     | Firmicutes     | <i>Staphylococcus</i>       |
| 131    | Proteobacteria | <i>Sphingomonas</i>         |
| 224    | Proteobacteria | <i>Acinetobacter</i>        |
| 270    | Actinobacteria | <i>Rothia</i>               |
| 486    | Firmicutes     | <i>Enterococcus</i>         |
| 681    | Actinobacteria | <i>Corynebacterium</i>      |
| 710    | Actinobacteria | <i>Propionibacterium</i>    |
| 714    | Proteobacteria | <i>Escherichia-Shigella</i> |
| 724    | Proteobacteria | -                           |
| 806    | Actinobacteria | <i>Microbacterium</i>       |
| 1039   | Proteobacteria | <i>Pseudomonas</i>          |
| 1068   | Proteobacteria | <i>Pantoea</i>              |

192

193



194 **Supplementary Table S6** HOMOVA analysis across *B. mori* life stages.

195

| Group | SSwithin/(Ni-1) | Compare to | p-value |
|-------|-----------------|------------|---------|
|       |                 | L2         | 0.394   |
|       |                 | L3         | 0.397   |
| L1    | 0.229134        | L4         | 0.300   |
|       |                 | L5         | 0.388   |
|       |                 | adult      | 0.352   |
|       |                 | L3         | 0.104   |
| L2    | 0.073367        | L4         | 0.106   |
|       |                 | L5         | 0.115   |
|       |                 | adult      | 0.791   |
|       |                 | L4         | 0.798   |
| L3    | 0.110096        | L5         | 0.292   |
|       |                 | adult      | 0.395   |
|       |                 | L5         | > 0.999 |
| L4    | 0.101862        | adult      | 0.397   |
| L5    | 0.100954        | adult      | 0.378   |
| adult | 0.0663201       | -          | -       |

196

197

198

199 **Supplementary Table S7** Statistical test for species richness among different

200 Lepidoptera species (one-way ANOVA, LSD post-hoc test).

201

| Group1             | Group2             | Mean<br>difference (I-J) | Std. Error. | Sig.   | 95% Confidence Interval |             |
|--------------------|--------------------|--------------------------|-------------|--------|-------------------------|-------------|
|                    |                    |                          |             |        | Lower Bound             | Upper Bound |
| <i>A. major</i>    | <i>B. mori</i>     | -72.1667*                | 12.37717    | .002** | -103.9832               | -40.3501    |
|                    | <i>D. pyloalis</i> | -42.5000*                | 12.37717    | .019*  | -74.3165                | -10.6835    |
| <i>B. mori</i>     | <i>A. major</i>    | 72.1667*                 | 12.37717    | .002** | 40.3501                 | 103.9832    |
|                    | <i>D. pyloalis</i> | 29.6667*                 | 11.07048    | .044*  | 1.2091                  | 58.1242     |
| <i>D. pyloalis</i> | <i>A. major</i>    | 42.5000*                 | 12.37717    | .019*  | 10.6835                 | 74.3165     |
|                    | <i>B. mori</i>     | -29.6667*                | 11.07048    | .044*  | -58.1242                | -1.2091     |

202 \* :  $P \leq 0.05$  , \*\* :  $P \leq 0.01$

203 **Supplementary Table S8** PERMANOVA test based on distance matrices.

204

| <b>Test</b>             | <b>Sample group</b>                                        | <b>Value</b> | <b>Bray-Curtis</b>  | <b>Weighted<br/>UniFrac</b> | <b>Unweighted<br/>UniFrac</b> |
|-------------------------|------------------------------------------------------------|--------------|---------------------|-----------------------------|-------------------------------|
| PERMANOVA<br>("adonis") | RNA: <i>B. mori</i> early-instar vs.<br>late-instar        | R2<br>p      | 0.2959<br><0.001**  | 0.29398<br><0.001**         | 0.18967<br><0.001**           |
|                         | RNA: domesticated silkworm<br>vs. wild Lepidoptera insects | R2<br>p      | 0.401661<br>0.041*  | 0.39017<br>0.034*           | 0.3233<br>0.011*              |
|                         | DNA: <i>B. mori</i> early-instar vs.<br>late-instar        | R2<br>p      | 0.42206<br><0.001** | 0.41705<br><0.001**         | 0.09134<br>0.008**            |
|                         | DNA: domesticated silkworm<br>vs. wild Lepidoptera insects | R2<br>p      | 0.40079<br>0.019**  | 0.28072<br>0.1              | 0.25725<br>0.028*             |

---

|                     |    |         |         |         |
|---------------------|----|---------|---------|---------|
| Foregut vs. Midgut  | R2 | 0.24993 | 0.28198 | 0.20074 |
|                     | p  | 0.4     | 0.3     | 0.9     |
| Foregut vs. Hindgut | R2 | 0.34755 | 0.35081 | 0.51186 |
|                     | p  | 0.6667  | 0.6667  | 0.1     |
| Midgut vs. Hindgut  | R2 | 0.28567 | 0.32796 | 0.24206 |
|                     | p  | 0.4     | 0.3     | 1       |

---

205 **Supplementary Table S9** Statistical test for species richness among different  
 206 gut regions (one-way ANOVA, LSD post-hoc test).

| Group1    | Group2    | Mean<br>difference (I-J) | Std. Error. | Sig. | 95% Confidence Interval |             |
|-----------|-----------|--------------------------|-------------|------|-------------------------|-------------|
|           |           |                          |             |      | Lower Bound             | Upper Bound |
|           | Hindgut   | 33.0000                  | 25.77359    | .248 | -30.0657                | 96.0657     |
| Foregut   | Midgut    | 26.5000                  | 23.52796    | .303 | -31.0708                | 84.0708     |
|           | Whole gut | 16.8333                  | 23.52796    | .501 | -40.7375                | 74.4042     |
|           | Foregut   | -33.0000                 | 25.77359    | .248 | -96.0657                | 30.0657     |
| Hindgut   | Midgut    | -6.5000                  | 23.52796    | .792 | -64.0708                | 51.0708     |
|           | Whole gut | -16.1667                 | 23.52796    | .518 | -73.7375                | 41.4042     |
|           | Foregut   | -26.5000                 | 23.52796    | .303 | -84.0708                | 31.0708     |
| Midgut    | Hindgut   | 6.5000                   | 23.52796    | .792 | -51.0708                | 64.0708     |
|           | Whole gut | -9.6667                  | 21.04405    | .662 | -61.1596                | 41.8263     |
|           | Foregut   | -16.8333                 | 23.52796    | .501 | -74.4042                | 40.7375     |
| Whole gut | Hindgut   | 16.1667                  | 23.52796    | .518 | -41.4042                | 73.7375     |
|           | Midgut    | 9.6667                   | 21.04405    | .662 | -41.8263                | 61.1596     |

207

208 **Supplementary Table S10** Statistical test for species richness across *B. mori*

209 life stages (one-way ANOVA, LSD post-hoc test).

| Group1 | Group2 | Mean<br>difference (I-J) | Std. Error. | Sig.   | 95% Confidence Interval |             |
|--------|--------|--------------------------|-------------|--------|-------------------------|-------------|
|        |        |                          |             |        | Lower Bound             | Upper Bound |
| L1     | L2     | -44.6667*                | 11.68332    | .003** | -70.6987                | -18.6346    |
|        | L3     | -30.0000*                | 11.68332    | .028*  | -56.0321                | -3.9679     |
|        | L4     | -39.6667*                | 11.68332    | .007** | -65.6987                | -13.6346    |
|        | L5     | -60.6667*                | 11.68332    | .000** | -86.6987                | -34.6346    |
|        | adult  | -43.0000*                | 12.79844    | .007** | -71.5167                | -14.4833    |
| L2     | L1     | 44.6667*                 | 11.68332    | .003** | 18.6346                 | 70.6987     |
|        | L3     | 14.6667                  | 10.44988    | .191   | -8.6171                 | 37.9505     |
|        | L4     | 5.0000                   | 10.44988    | .643   | -18.2838                | 28.2838     |
|        | L5     | -16.0000                 | 10.44988    | .157   | -39.2838                | 7.2838      |
|        | adult  | 1.6667                   | 11.68332    | .889   | -24.3654                | 27.6987     |
| L3     | L1     | 30.0000*                 | 11.68332    | .028*  | 3.9679                  | 56.0321     |
|        | L2     | -14.6667                 | 10.44988    | .191   | -37.9505                | 8.6171      |
|        | L4     | -9.6667                  | 10.44988    | .377   | -32.9505                | 13.6171     |
|        | L5     | -30.6667*                | 10.44988    | .015*  | -53.9505                | -7.3829     |
|        | adult  | -13.0000                 | 11.68332    | .292   | -39.0321                | 13.0321     |
| L4     | L1     | 39.6667*                 | 11.68332    | .007** | 13.6346                 | 65.6987     |
|        | L2     | -5.0000                  | 10.44988    | .643   | -28.2838                | 18.2838     |

|       |       |          |          |        |          |         |
|-------|-------|----------|----------|--------|----------|---------|
|       | L3    | 9.6667   | 10.44988 | .377   | -13.6171 | 32.9505 |
|       | L5    | -21.0000 | 10.44988 | .072   | -44.2838 | 2.2838  |
|       | adult | -3.3333  | 11.68332 | .781   | -29.3654 | 22.6987 |
|       | L1    | 60.6667* | 11.68332 | .000** | 34.6346  | 86.6987 |
|       | L2    | 16.0000  | 10.44988 | .157   | -7.2838  | 39.2838 |
| L5    | L3    | 30.6667* | 10.44988 | .015*  | 7.3829   | 53.9505 |
|       | L4    | 21.0000  | 10.44988 | .072   | -2.2838  | 44.2838 |
|       | adult | 17.6667  | 11.68332 | .161   | -8.3654  | 43.6987 |
|       | L1    | 43.0000* | 12.79844 | .007** | 14.4833  | 71.5167 |
|       | L2    | -1.6667  | 11.68332 | .889   | -27.6987 | 24.3654 |
| adult | L3    | 13.0000  | 11.68332 | .292   | -13.0321 | 39.0321 |
|       | L4    | 3.3333   | 11.68332 | .781   | -22.6987 | 29.3654 |
|       | L5    | -17.6667 | 11.68332 | .161   | -43.6987 | 8.3654  |

210 \* :  $P \leq 0.05$  , \*\* :  $P \leq 0.01$

211 **Supplementary Figures**

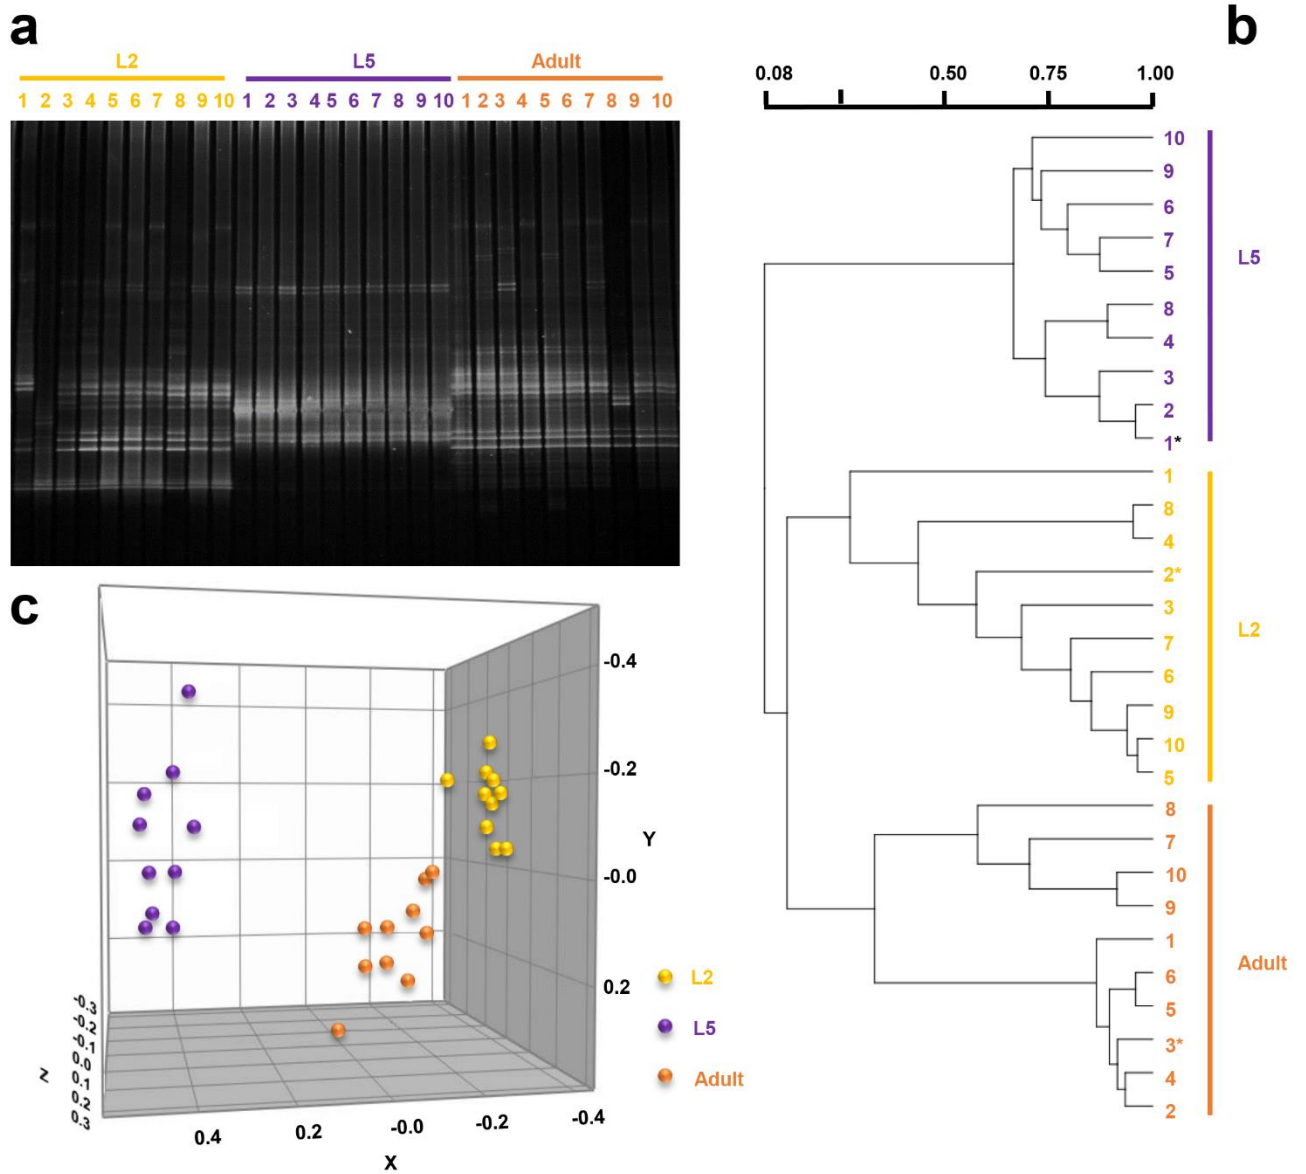

212

213 **Supplementary Figure S1** DGGE analyses of PCR-amplified 16S rRNA gene

214 fragments of bacterial communities across silkworm life-stage. (a) DGGE

215 patterns of the early-instar (L2) and late-instar (L5) larval gut microbiota and

216 adult gut microbiota of different individuals. (b) Dendrogram of community

217 DGGE fingerprint similarities. Dendrogram was constructed by the unweighted

218 pair group method using arithmetic averages (UPGMA). (c) Multidimensional



219 scaling (MDS) analysis of the cluster shown in (b). MDS is an optimized 3D  
220 representation of the similarity matrix, and these similarities were calculated as  
221 a best estimate using the Euclidean distance between two gel lanes (points in  
222 the MDS plot) to provide a convenient visual interpretation. The X-, Y-, and Z-  
223 axes separately represent three different dimensions: Dim 1, Dim 2, and Dim 3.  
224 According to the plot, individual samples (same color key) of each life-stage  
225 were grouped together, which suggested the uniqueness and stability of the  
226 predominant microbiota composition of each individual. \*, represents the MiSeq  
227 sequencing sample.

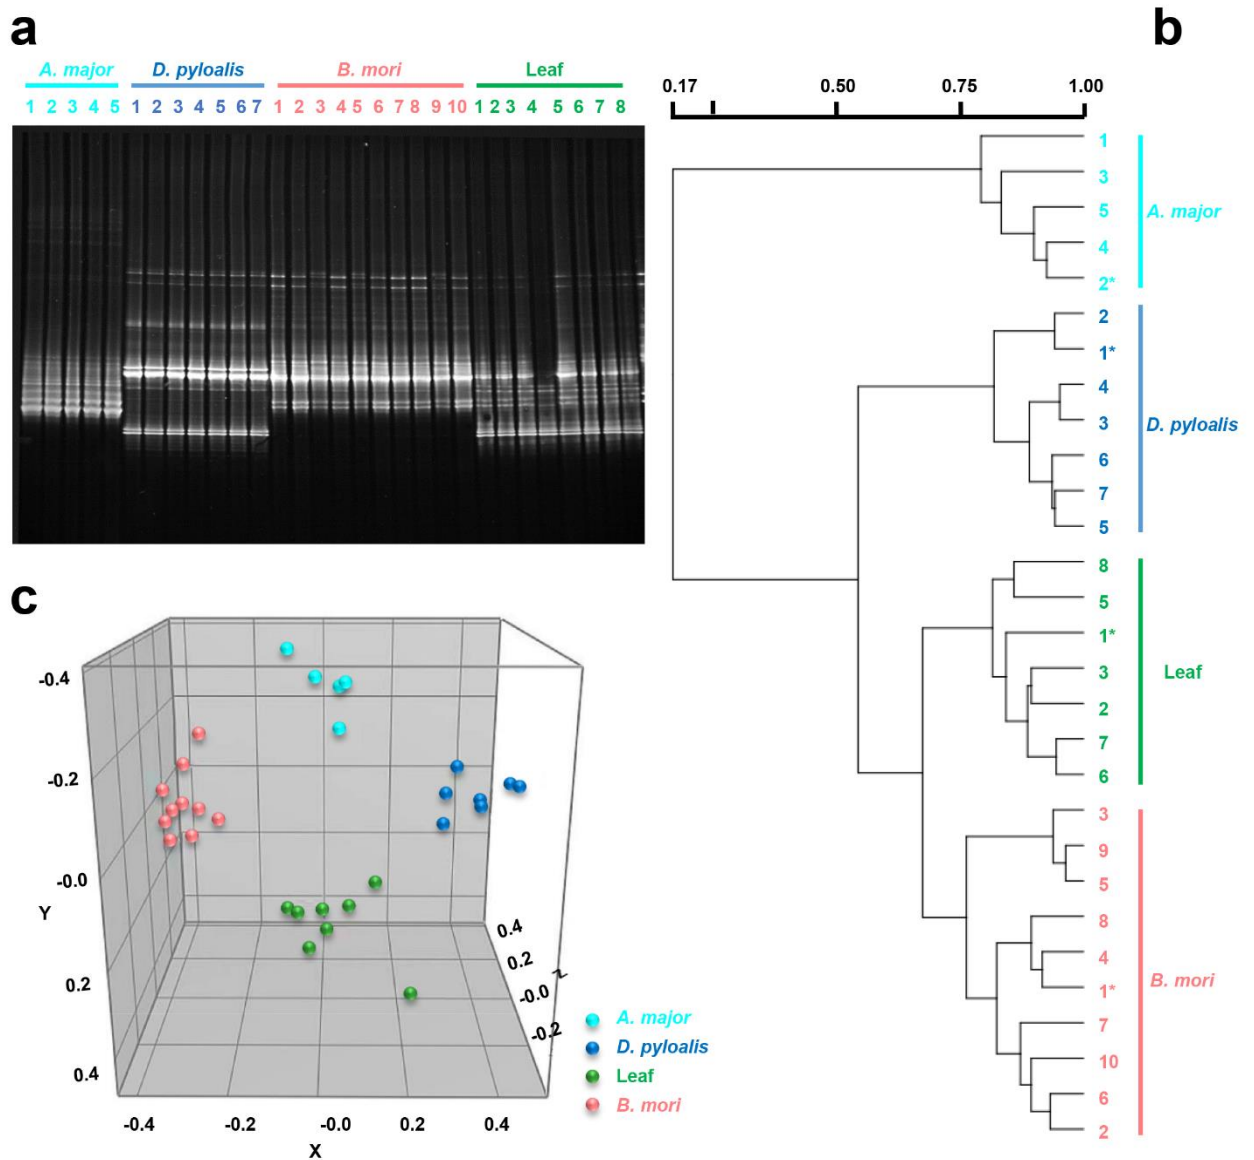

228

229 **Supplementary Figure S2** DGGE analyses of PCR-amplified 16S rRNA gene

230 fragments of bacterial communities associated with mulberry-feeding

231 Lepidoptera insects and mulberry leaves. (a) DGGE patterns of the final instar

232 larval gut microbiotas of *A. major*, *D. pyloalis* and *B. mori*, and microbiota

233 associated with mulberry leaves. (b) Dendrogram of community DGGE

234 fingerprint similarities. Dendrogram was constructed by the unweighted pair

235 group method using arithmetic averages (UPGMA). (c) Multidimensional

236 scaling (MDS) analysis of the cluster shown in (b). MDS is an optimized 3D

237 representation of the similarity matrix, and these similarities were calculated as  
238 a best estimate using the Euclidean distance between two gel lanes (points in  
239 the MDS plot) to provide a convenient visual interpretation. The X-, Y-, and Z-  
240 axes separately represent three different dimensions: Dim 1, Dim 2, and Dim 3.  
241 According to the plot, individual samples (same color key) of each host species  
242 were grouped together, which suggested the uniqueness and stability of the  
243 predominant microbiota composition of each individual. \*, represents the MiSeq  
244 sequencing sample.

245

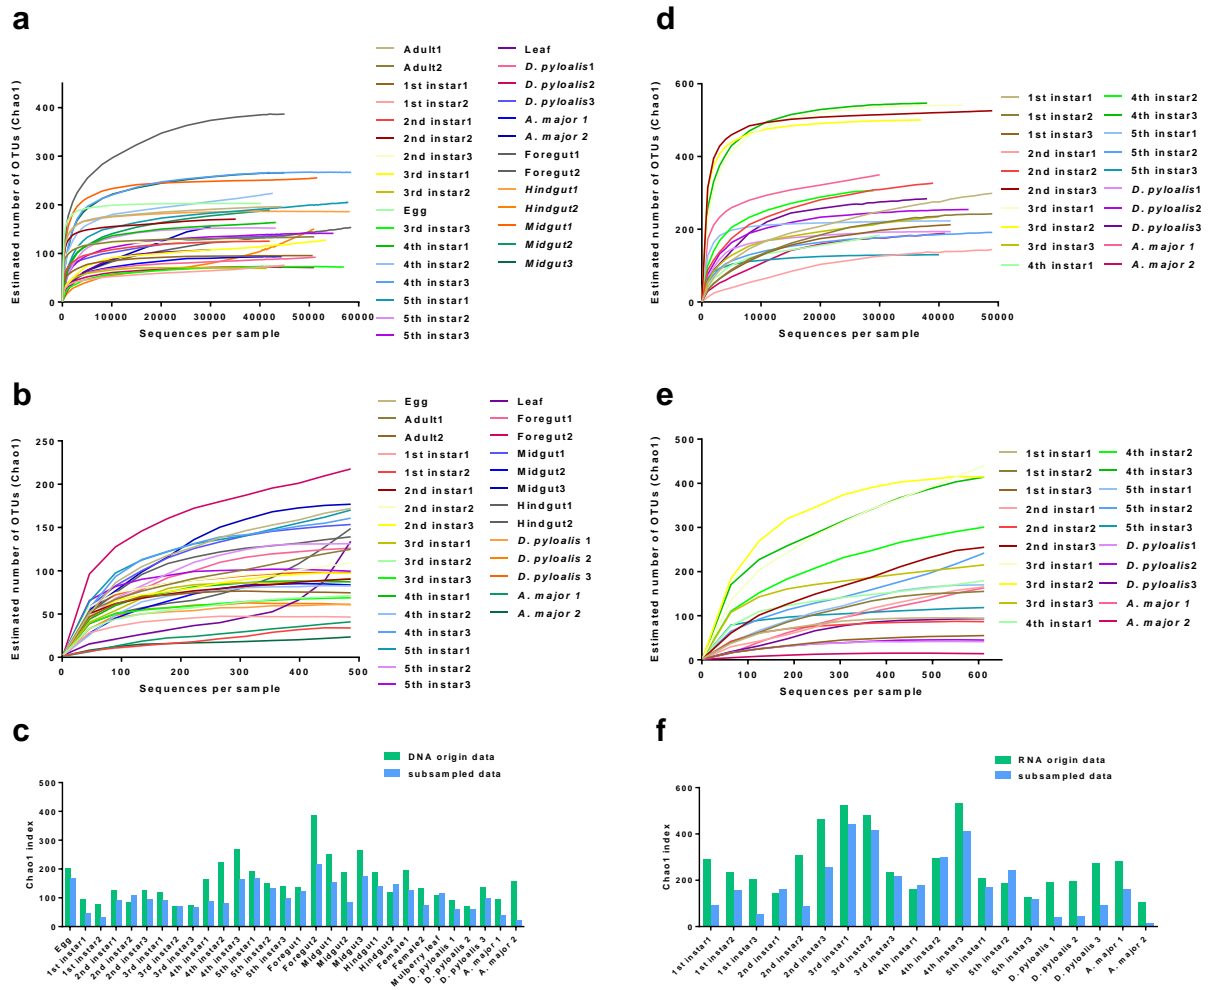

246

247 **Supplementary Figure S3** Rarefaction curves depicted from original

248 sequencing data sets and randomly subsampled data sets with the same

249 number of 16S sequences. (a) and (d), rarefaction curves of original DNA and

250 RNA sequencing samples. (b) and (e), rarefaction curves of subsampled DNA

251 (486) and RNA (612) sequences. Comparison of species richness between

252 original and subsampled sequencing data was shown in (c) DNA samples and

253 (f) RNA samples. Diversity index was calculated with 1000 iteration.

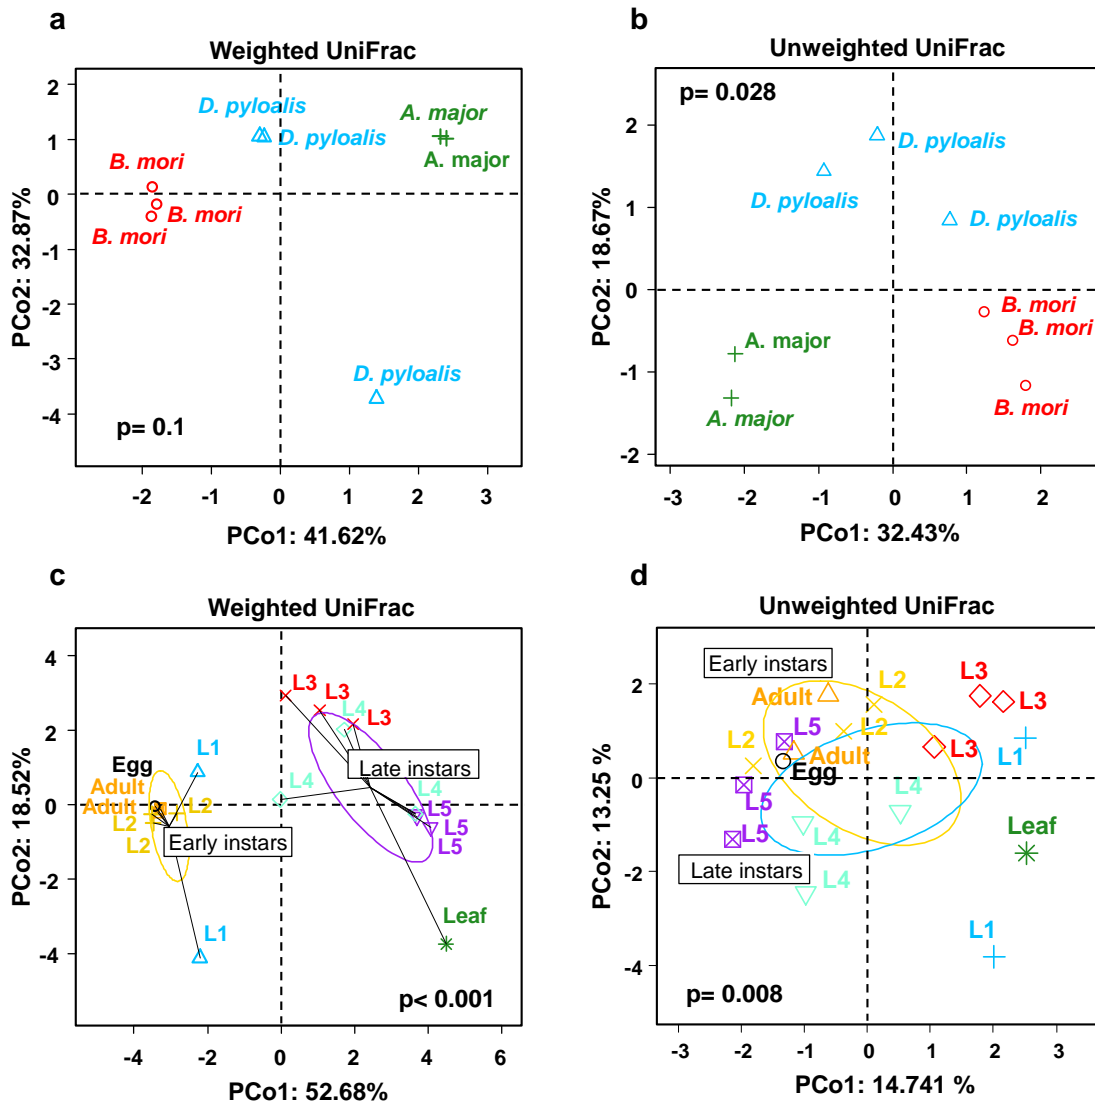

254

255 **Supplementary Figure S4** PCoA analysis of DNA sequencing samples. (a)

256 PCoA plot using weighted and (b) unweighted UniFrac distance between

257 Lepidoptera species. (c) PCoA plot using weighted and (d) unweighted UniFrac

258 distance across *B. mori* life-stage. PERMANOVA was used for significance

259 analysis, permutation=999.

260

261

262

263

264

265

266

267

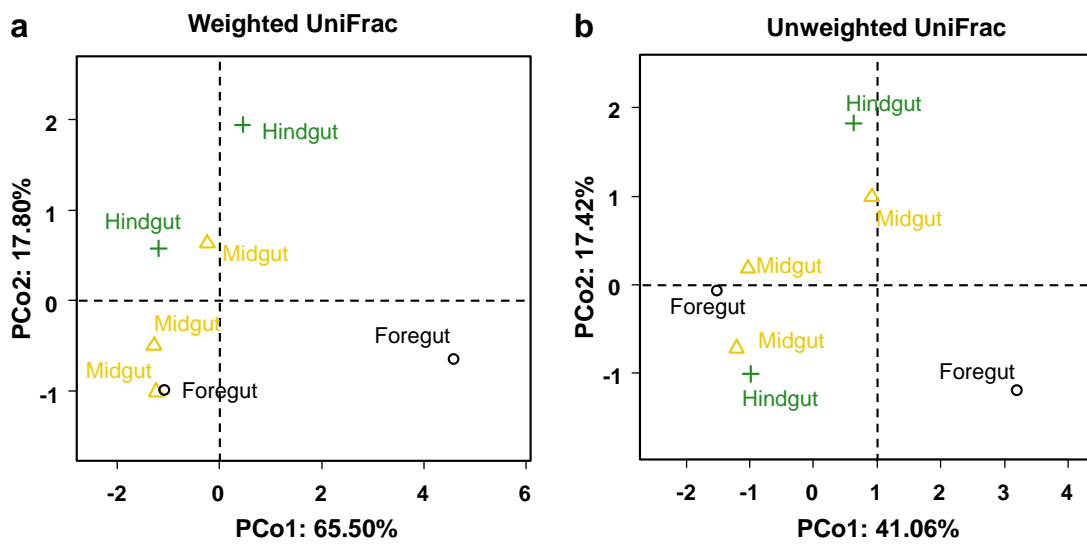

268

269 **Supplementary Figure S5** PCoA analysis of gut regions. (a) PCoA plot using

270 weighted and (b) unweighted UniFrac distance between gut regions.

271 PERMANOVA was used for significance analysis, permutation=999,  $P > 0.05$ .

272

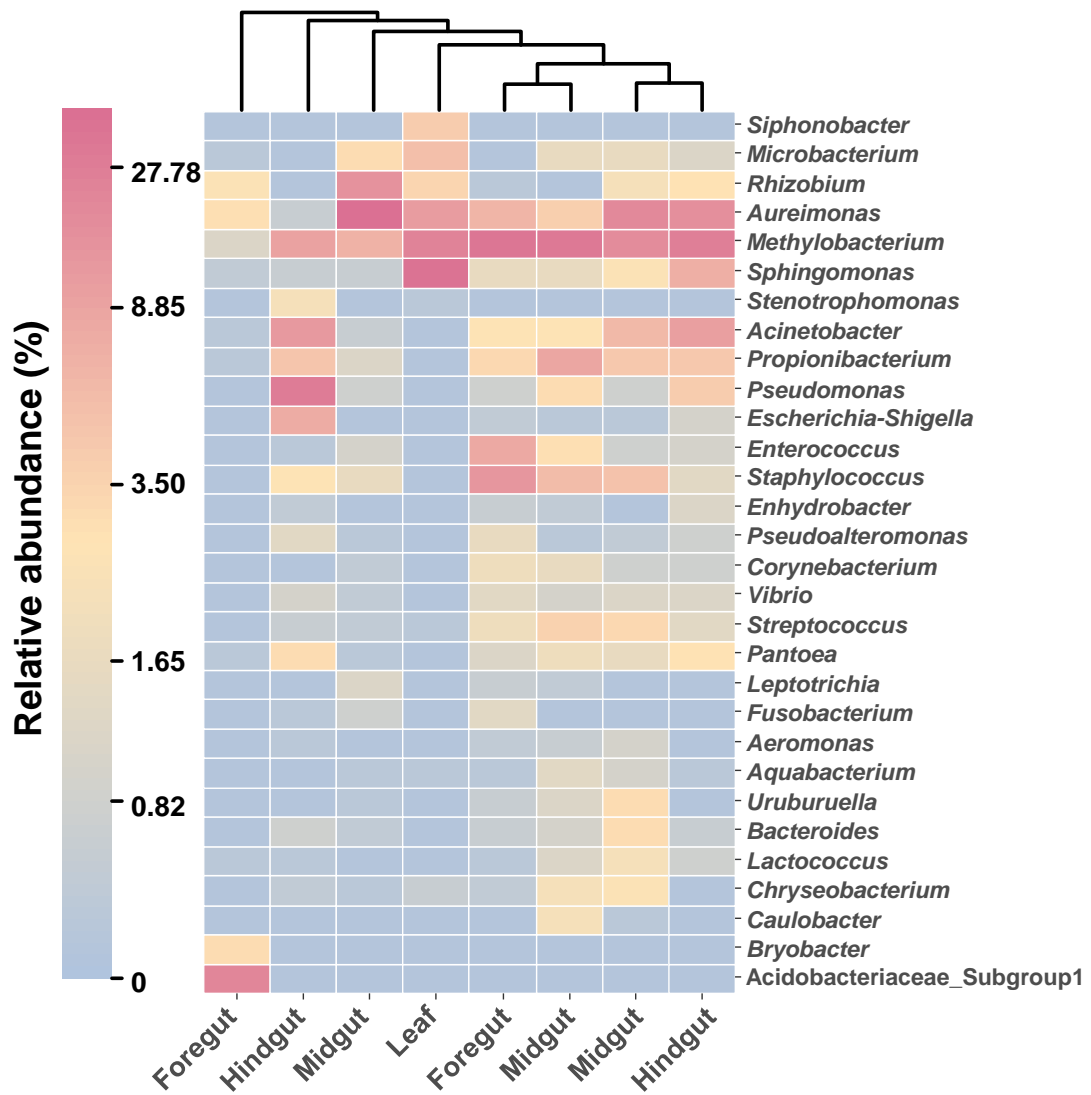

273

274 **Supplementary Figure S6** Clustering analysis of dominant gut bacteria in

275 different gut regions of the 5<sup>th</sup>-instar *B. mori*. Relative abundances of the 30

276 most abundant genera are shown in a heatmap, with cluster analysis using

277 Bray-Curtis distance, followed by a complete-linkage method.

278

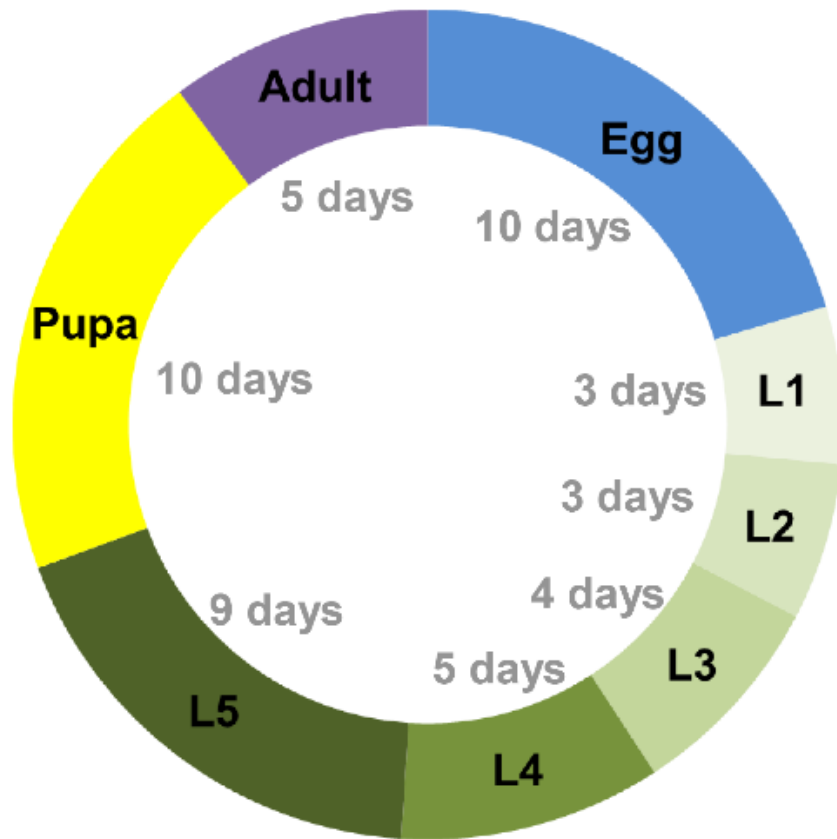

279

280 **Supplementary Figure S7** *Bombyx mori* life cycle.

281

282

283

284

285

286

287

288

289



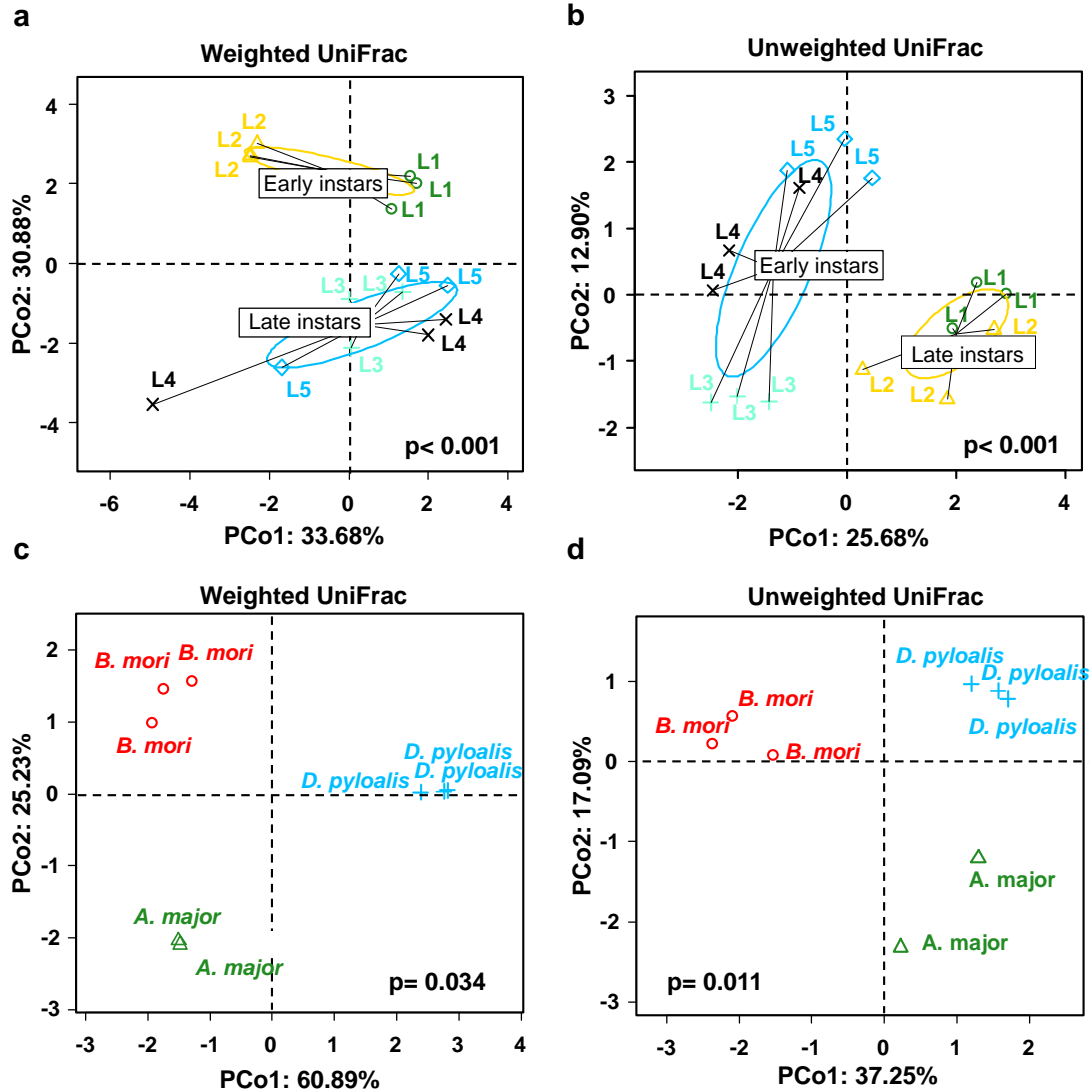

290

291 **Supplementary Figure S8** PCoA analysis of RNA sequencing samples. (a)

292 PCoA plot using weighted and (b) unweighted UniFrac distance across *B. mori*

293 life-stage. (c) PCoA plot using weighted and (d) unweighted UniFrac distance

294 between Lepidoptera species. PERMANOVA was used for significance

295 analysis, permutation=999.

296

297

298

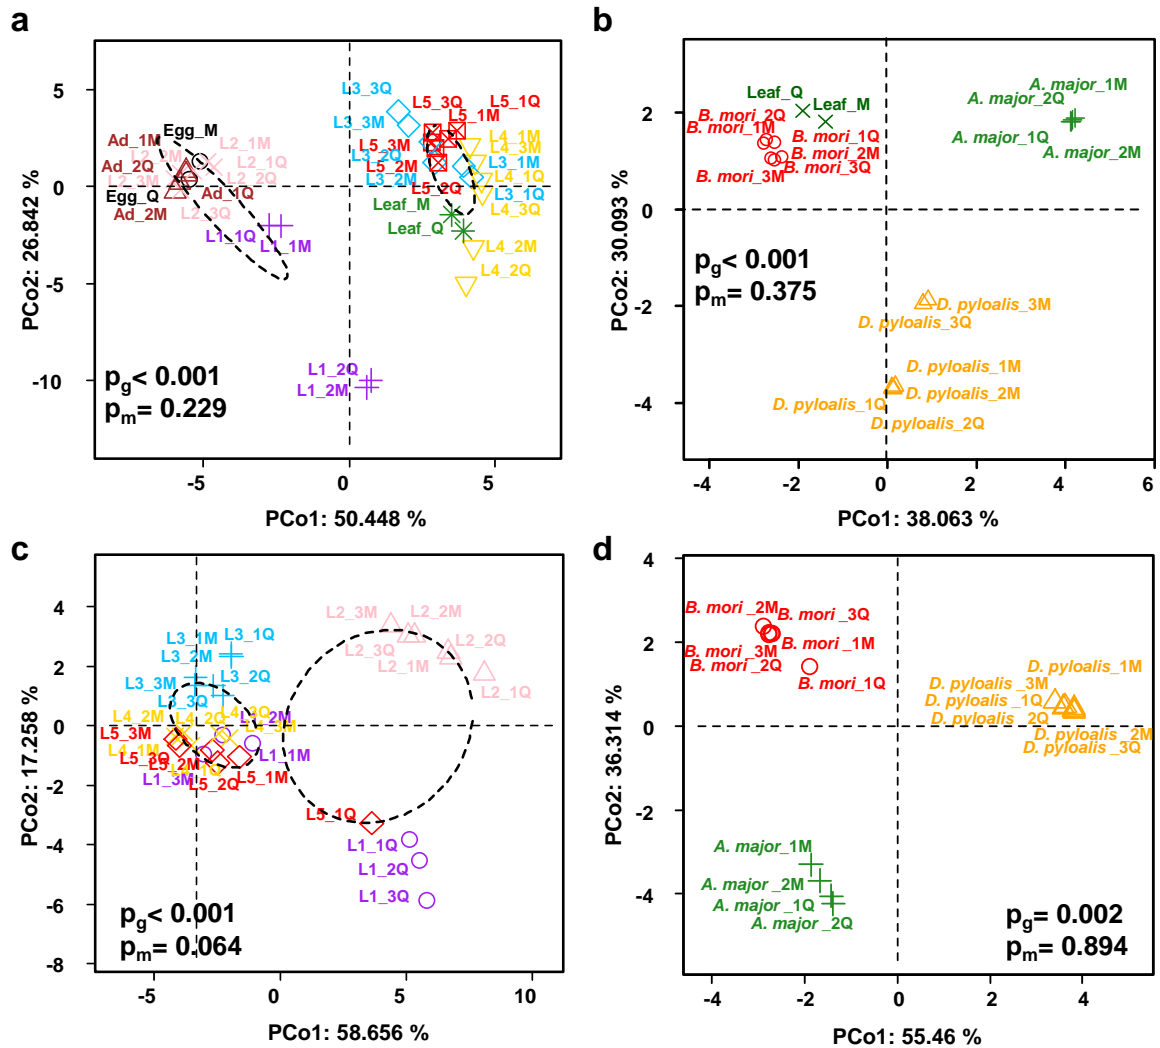

299

300 **Supplementary Figure S9** Comparison of sequencing results analyzed by  
 301 mothur and by QIIME. (a) PCoA plot using Bray–Curtis distances across *B. mori*  
 302 life-stage and (b) between Lepidoptera species in DNA sequencing samples.  
 303 (c) PCoA plot using Bray–Curtis distances across *B. mori* life-stage and (d)  
 304 between Lepidoptera species in RNA sequencing samples. Bray-Curtis matrix  
 305 was generated from the OTU table combining the 30 most abundant genera  
 306 from QIIME and mothur, respectively. M, represents data extracted from mothur;  
 307 Q, from QIIME. P value, calculated by PERMANOVA at 999 permutation. Pg, P

308 value of group variation between life-stage (a, c) or host species (b, d). Pm, P  
309 value of method variation between mothur and QIIME analysis.

310

## 311 **References**

312 Anderson IC, Cairney JW (2004). Diversity and ecology of soil fungal  
313 communities: increased understanding through the application of  
314 molecular techniques. *Environ Microbiol* **6**: 769–779.

315

316 Bolger AM, Lohse M, Usadel B (2014). Trimmomatic: a flexible trimmer  
317 for Illumina sequence data. *Bioinformatics* **30**: 2114–2120.

318

319 Caporaso JG, Kuczynski J, Stombaugh J, Bittinger K, Bushman FD,  
320 Costello EK *et al.* (2010). QIIME allows analysis of high-throughput  
321 community sequencing data. *Nat Methods* **7**: 335–336.

322

323 Chen B, Teh BS, Sun C, Hu S, Lu X, Boland W *et al.* (2016). Biodiversity  
324 and activity of the gut microbiota across the life history of the  
325 insect herbivore *Spodoptera littoralis*. *Sci Rep* **6**: 29505.

326

327 DeSantis TZ, Hugenholtz P, Larsen N, Rojas M, Brodie EL, Keller K *et*  
328 *al.* (2006). Greengenes, a chimera-checked 16S rRNA gene database and  
329 workbench compatible with ARB. *Appl Environ Microbiol* **72**: 5069–5072.

330

331 Edgar RC (2010). Search and clustering orders of magnitude faster than  
332 BLAST. *Bioinformatics* **26**: 2460–2461.

333

334 Egert M, Stingl U, Bruun LD, Pommerenke B, Brune A, Friedrich MW (2005).  
335 Structure and topology of microbial communities in the major gut  
336 compartments of *Melolontha melolontha* larvae (Coleoptera:  
337 Scarabaeidae). *Appl Environ Microbiol* **71**: 4556–4566.

338

339 Gilleland E, Viii G (2014). R Development Core Team (2008). R: A  
340 language and environment for statistical computing. R Foundation for  
341 Statistical Computing.

342

343 Kelly BJ, Gross R, Bittinger K, Sherrill-Mix S, Lewis JD, Collman RG  
344 *et al.* (2015). Power and sample-size estimation for microbiome studies

345 using pairwise distances and PERMANOVA. *Bioinformatics* **31**: 2461–2468.  
346  
347 Koljalg U, Nilsson RH, Abarenkov K, Tedersoo L, Taylor AF, Bahram M *et*  
348 *al.* (2013). Towards a unified paradigm for sequence-based  
349 identification of fungi. *Mol Ecol* **22**: 5271–5277.  
350  
351 Lee DH, Zo YG, Kim SJ (1996). Nonradioactive method to study genetic  
352 profiles of natural bacterial communities by PCR-single-strand-  
353 conformation polymorphism. *Appl Environ Microbiol* **62**: 3112–3120.  
354  
355 Lu H, He J, Wu Z, Xu W, Zhang H, Ye P *et al.* (2013). Assessment of  
356 microbiome variation during the perioperative period in liver  
357 transplant patients: a retrospective analysis. *Microbial Ecol* **65**: 781–  
358 791.  
359  
360 Magoc T, Salzberg SL (2011). FLASH: fast length adjustment of short  
361 reads to improve genome assemblies. *Bioinformatics* **27**: 2957–2963.  
362  
363 McDonald D, Price MN, Goodrich J, Nawrocki EP, DeSantis TZ, Probst A  
364 *et al.* (2012). An improved Greengenes taxonomy with explicit ranks for  
365 ecological and evolutionary analyses of bacteria and archaea. *ISME J*  
366 **6**: 610–618.  
367  
368 Mukherjee PK, Chandra J, Retuerto M, Sikaroodi M, Brown RE, Jurevic R  
369 *et al.* (2014). Oral mycobiome analysis of HIV-infected patients:  
370 identification of *Pichia* as an antagonist of opportunistic fungi. *PLoS*  
371 *Pathog* **10**: e1003996.  
372  
373 Oksanen J, Kindt R, Legendre P, O’ Hara B, Stevens MHH, Oksanen MJ *et*  
374 *al.* (2007). The vegan package. *Community ecology package* **10**: 631–637.  
375  
376 Price MN, Dehal PS, Arkin AP (2010). FastTree 2—approximately maximum-  
377 likelihood trees for large alignments. *PLoS One* **5**: e9490.  
378  
379 Pruesse E, Quast C, Knittel K, Fuchs BM, Ludwig W, Peplies J *et al.*  
380 (2007). SILVA: a comprehensive online resource for quality checked and  
381 aligned ribosomal RNA sequence data compatible with ARB. *Nucleic Acids*  
382 *Res* **35**: 7188–7196.  
383  
384 R (2014). R: A language and environment for statistical computing.  
385 Vienna, Austria: R Foundation for Statistical Computing; 2014.  
386  
387 Schloss PD (2008). Evaluating different approaches that test whether  
388 microbial communities have the same structure. *ISME J* **2**: 265–275.

389  
390 Schloss PD, Westcott SL, Ryabin T, Hall JR, Hartmann M, Hollister EB  
391 *et al.* (2009). Introducing mothur: open-source, platform-independent,  
392 community-supported software for describing and comparing microbial  
393 communities. *Appl Environ Microbiol* **75**: 7537–7541.  
394  
395 Shao Y, Arias-Cordero E, Guo H, Bartram S, Boland W (2014). In vivo  
396 Pyro-SIP assessing active gut microbiota of the cotton leafworm,  
397 *Spodoptera littoralis*. *PLoS One* **9**: e85948.  
398  
399 Takano SI, Tuda M, Takasu K, Furuya N, Imamura Y, Kim S *et al.* (2017).  
400 Unique clade of alphaproteobacterial endosymbionts induces complete  
401 cytoplasmic incompatibility in the coconut beetle. *Proc Natl Acad Sci*  
402 *U S A* **114**: 6110–6115.  
403  
404 Tang ZZ, Chen G, Alekseyenko AV (2016). PERMANOVA-S: association test  
405 for microbial community composition that accommodates confounders and  
406 multiple distances. *Bioinformatics* **32**: 2618–2625.  
407  
408 Thompson CL, Wang B, Holmes AJ (2008). The immediate environment during  
409 postnatal development has long-term impact on gut community structure  
410 in pigs. *ISME J* **2**: 739–748.  
411  
412 Wang Q, Garrity GM, Tiedje JM, Cole JR (2007). Naive Bayesian  
413 classifier for rapid assignment of rRNA sequences into the new  
414 bacterial taxonomy. *Appl Environ Microbiol* **73**: 5261–5267.  
415  
416 Wickham H (2016). *ggplot2: elegant graphics for data analysis*. Springer.  
417  
418 Xiong J, Liu Y, Lin X, Zhang H, Zeng J, Hou J *et al.* (2012). Geographic  
419 distance and pH drive bacterial distribution in alkaline lake sediments  
420 across Tibetan Plateau. *Environ Microbiol* **14**: 2457–2466.  
421  
422 Yun JH, Roh SW, Whon TW, Jung MJ, Kim MS, Park DS *et al.* (2014). Insect  
423 gut bacterial diversity determined by environmental habitat, diet,  
424 developmental stage, and phylogeny of host. *Appl Environ Microbiol* **80**:  
425 5254–5264.  
426
